# Supplementary material
Source: PubMed Central journal article supplement (PMC4256858)
Supplement: supp_pp.114.251371_251371Figure_S4.pdf [file supp_pp.114.251371_251371Figure_S4.pdf]

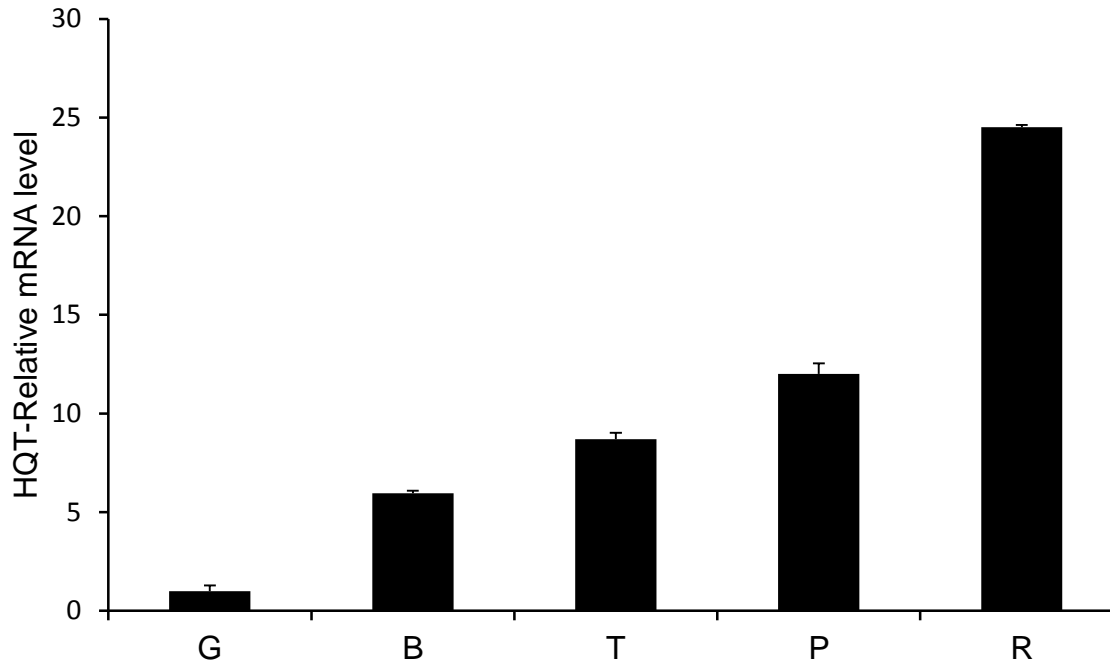

**Figure S4.** Expression of SIHQ T in tomato. The relative expression of the SIHQ T gene at different stages of fruit ripening (G: green, B: breaker, T: turning, P: pink and R: red stage) was measured by qRT-PCR, using ubiquitin to normalize expression levels. The error bars indicate standard deviation, calculated from three biological replicates.
