# Supplementary material
Source: PubMed Central journal article supplement (PMC4256858)
Supplement: supp_pp.114.251371_251371Figure_S7.pdf [file supp_pp.114.251371_251371Figure_S7.pdf]

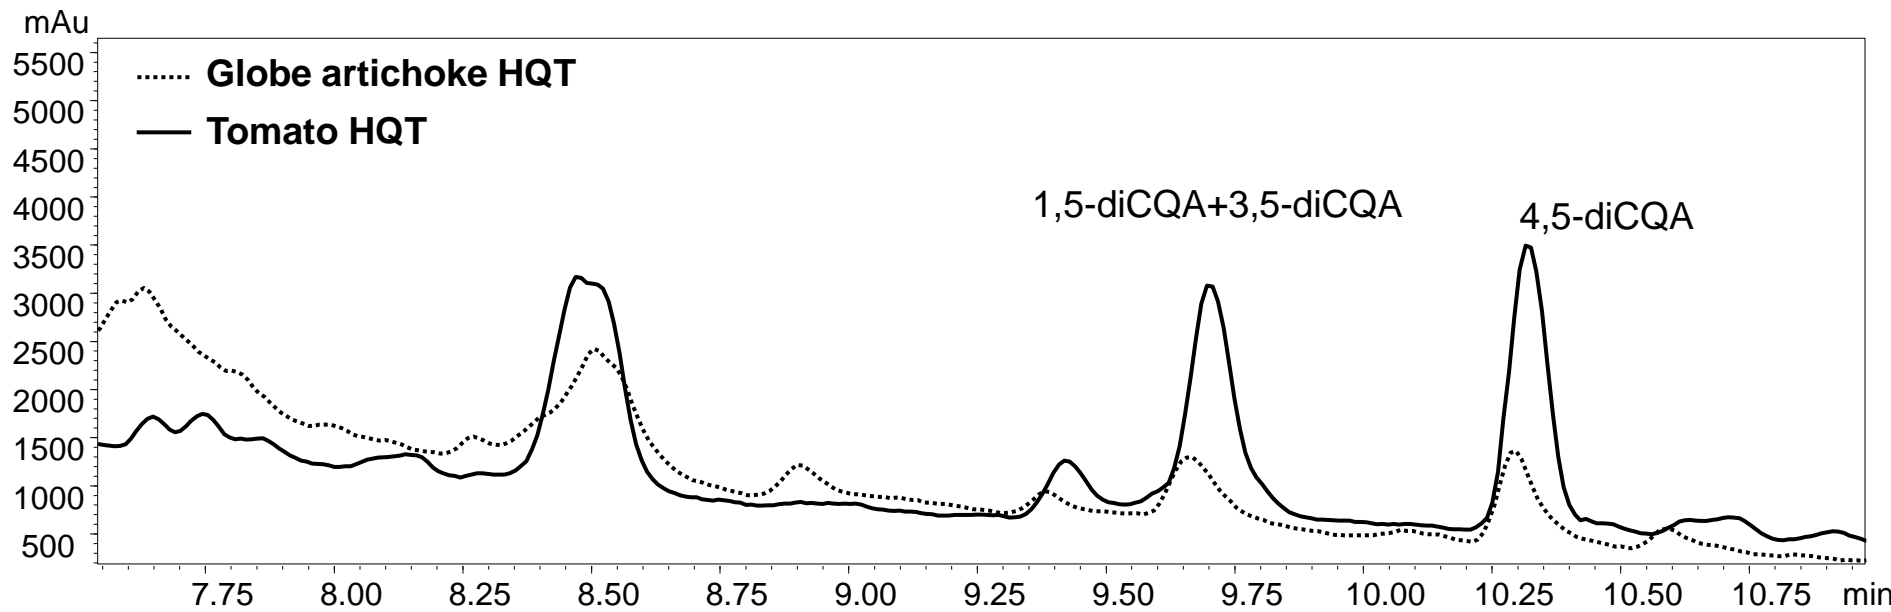

**Figure S7.** LC-PDA profiles (at 325 nm) of CCT activity with recombinant wild type SIHQT enzyme and globe artichoke HQT.
